# Supplementary material for: Discontinuation of anti‐PD‐1 monotherapy in advanced melanoma—Outcomes of daily clinical practice
Source: PubMed Central journal article supplement — Int J Cancer. 2021 Oct 2;150(2):317–26. doi: 10.1002/ijc.33800 (PMC9293478; doi:10.1002/ijc.33800), 2021-10-02
Supplement: IJC-150-317-s001.pdf [file IJC-150-317-s001.pdf]

## Supplement

# Discontinuation of anti-PD-1 monotherapy in advanced melanoma - outcomes of daily clinical practice

Michiel C.T. van Zeijl, Alfons J.M. van den Eertwegh, Michel W.J.M. Wouters<sup>1,4,5</sup>, Liesbeth C. de Wreede<sup>5</sup>, Maureen J.B. Aarts<sup>6</sup>, Franchette W.P.J. van den Berkmortel<sup>7</sup>, Jan-Willem B. de Groot<sup>8</sup>, Geke A.P. Hospers<sup>9</sup>, Ellen Kapiteijn<sup>2</sup>, Djura Piersma<sup>10</sup>, Rozemarijn S. van Rijn<sup>11</sup>, Karijn P.M. Suijkerbuijk<sup>12</sup>, Albert J. ten Tije<sup>13</sup>, Astrid A.M. van der Veldt<sup>14</sup>, Gerard Vreugdenhil<sup>15</sup>, Jacobus J.M. van der Hoeven<sup>16</sup>, John B.A.G. Haanen<sup>17\*</sup>

## Table of contents

|                  |   |
|------------------|---|
| <i>Figure S1</i> | 2 |
| <i>Figure S2</i> | 3 |
| <i>Figure S3</i> | 4 |
| <i>Table S1</i>  | 7 |

FIGURE S1

**Figure S1** Off-treatment survival outcomes for patients who discontinued anti-PD-1 monotherapy in the absence of adverse events or progressive disease and for patients who discontinued anti-PD-1 monotherapy because of adverse events. Kaplan-Meier curves of A) overall survival and B) progression-free survival after anti-PD-1 discontinuation of patients who discontinued anti-PD-1 monotherapy in the absence of adverse events or progressive disease (log-rank  $p < 0.001$  for both curves). Kaplan-Meier curves of C) overall survival and D) progression-free survival after anti-PD-1 discontinuation of patients who discontinued anti-PD-1 monotherapy because of adverse events (log-rank  $p < 0.17$  and  $p < 0.56$ , respectively). Patient characteristics can be found in Table S1. OS - overall survival, mo - month, prob - probability, CI - confidence interval.

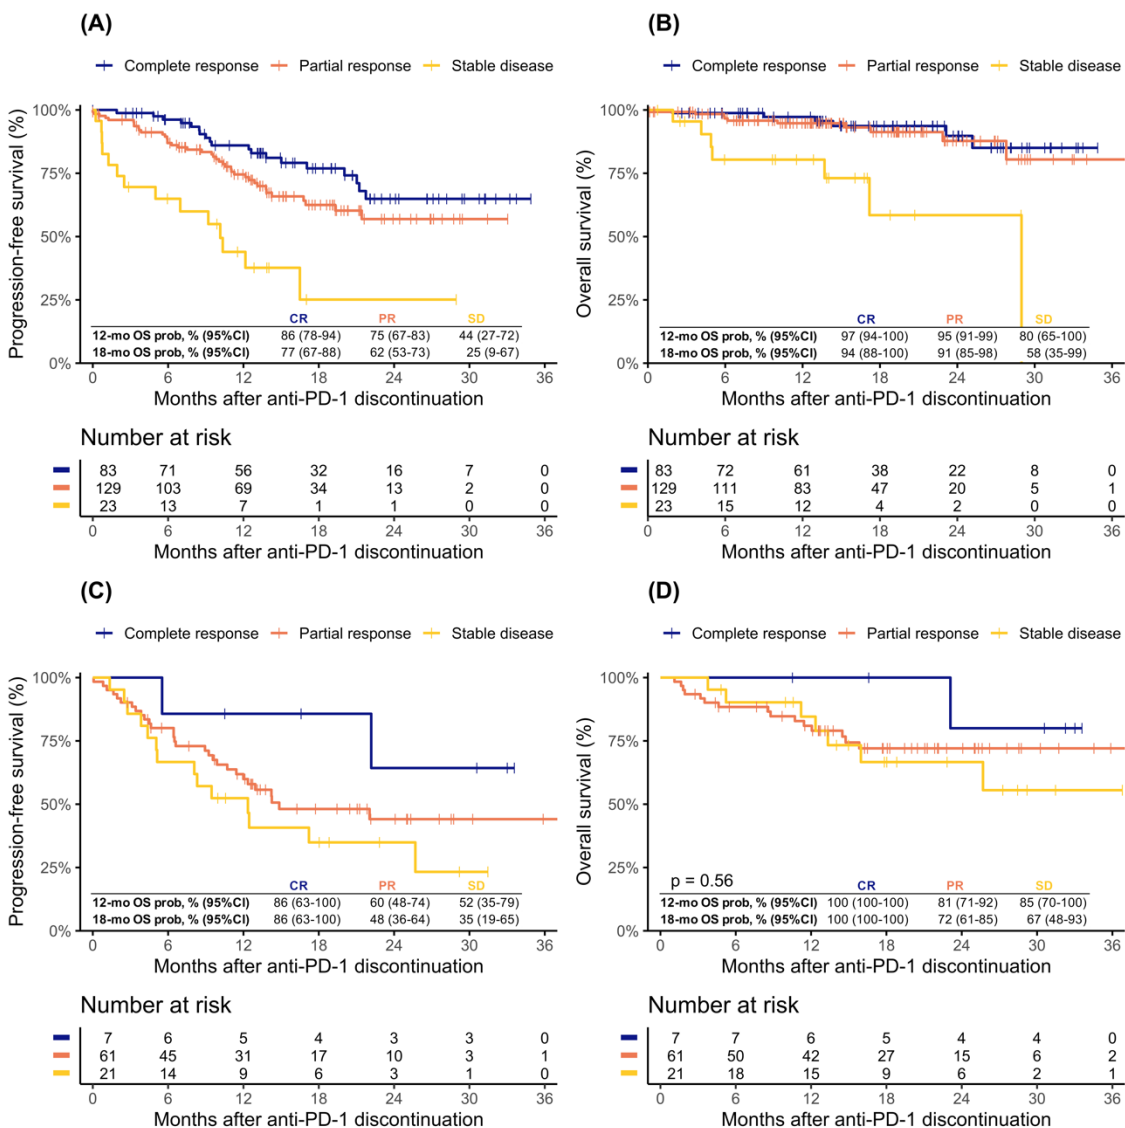

## FIGURE S2

**Figure S2** Second-line treatment after progression after anti-PD-1 discontinuation. For this figure re-treatment with anti-PD-1 monotherapy was considered second-line treatment.

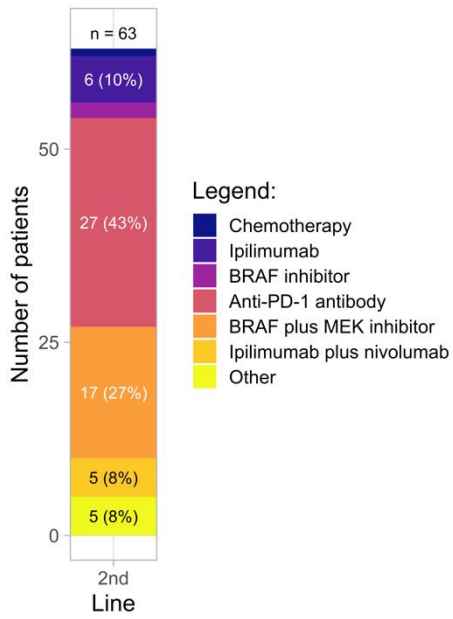

FIGURE S3

**Figure S3a** Best overall response of second-line treatment following progression after anti-PD-1 discontinuation for patients with a (A) complete response, (B) partial response and (C) stable disease on anti-PD-1 discontinuation. \*\* To date, no information on the next-line treatment received was available for these patients. CR - complete response, PR - partial response, SD - stable disease, PD - Progressive disease.

(A)

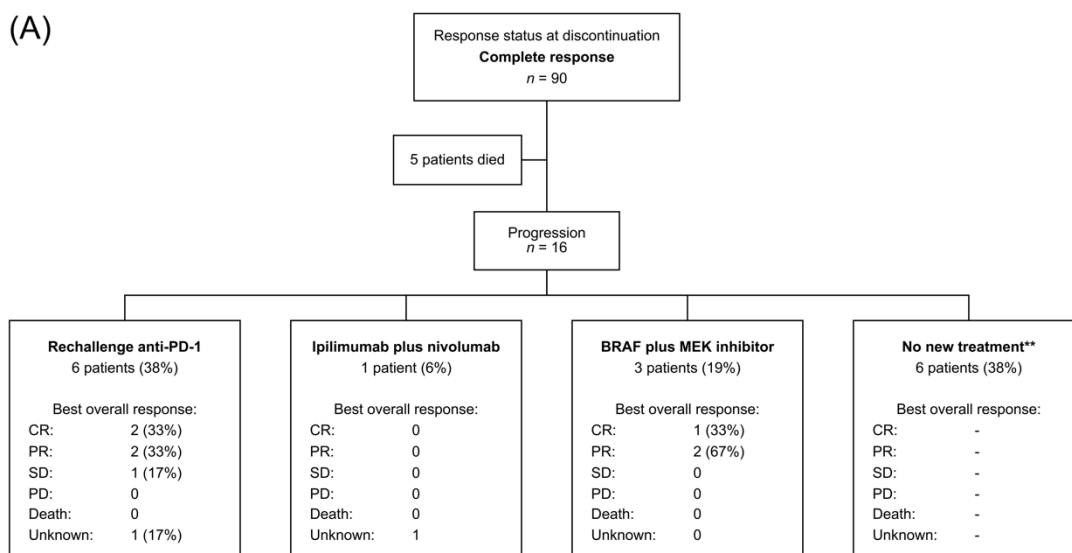

(B)

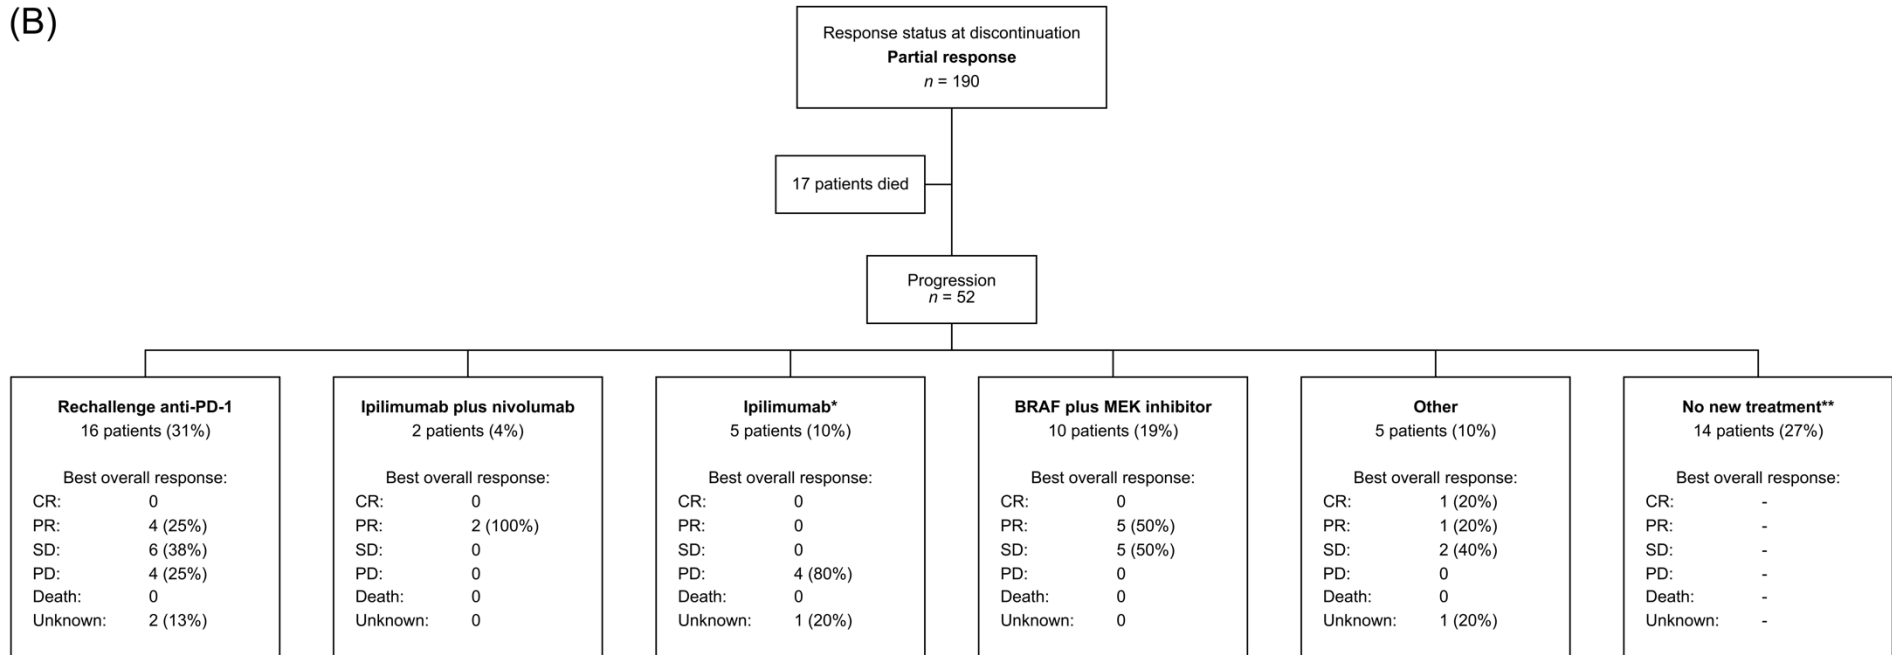

(C)

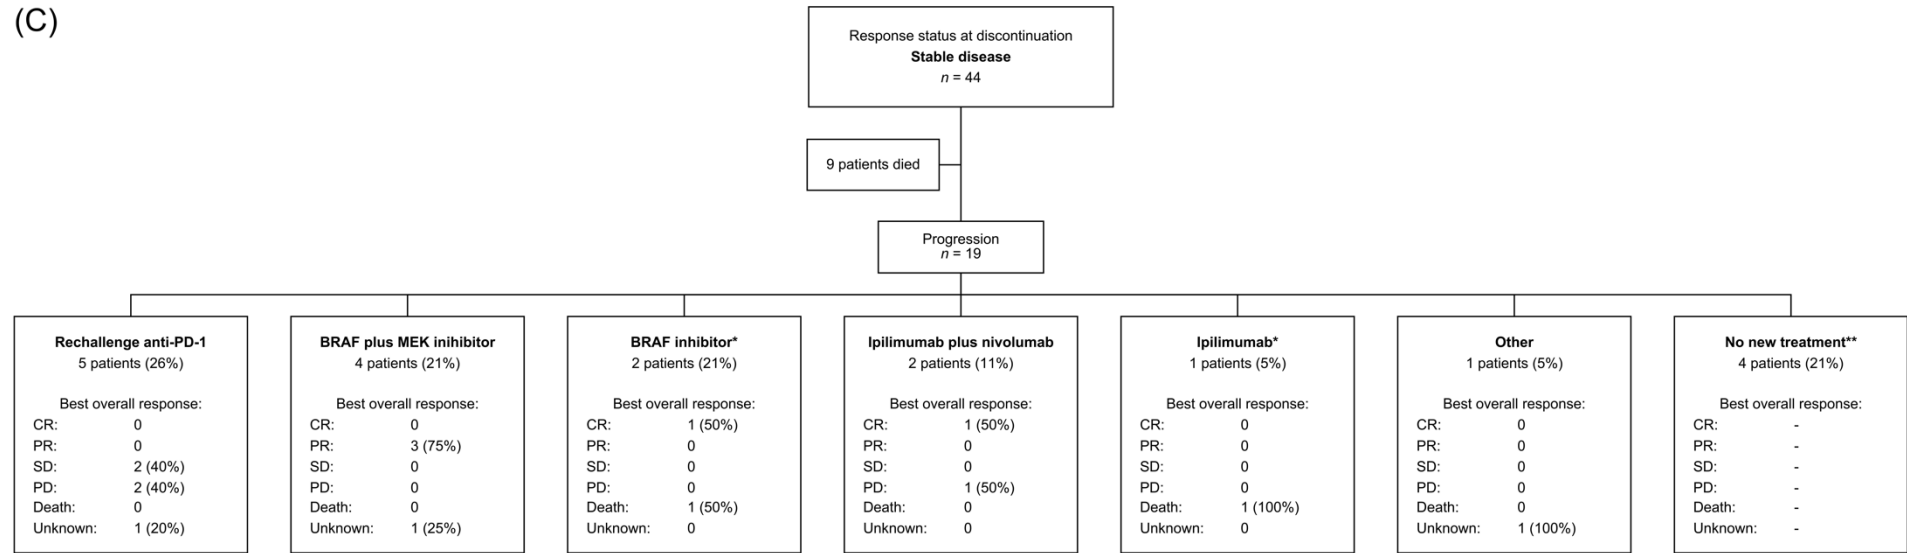

TABLE S1

**Table S1** Characteristics at the start of anti-PD-1 monotherapy of patients who discontinued anti-PD-1 monotherapy in the absence of adverse events or progressive disease (elective discontinuation) and for patients who discontinued anti-PD-1 monotherapy because of adverse events (non-elective discontinuation).

|                                     | <b>Non-elective<br/>discontinuation</b><br>(n=89) | <b>Elective<br/>discontinuation</b><br>(n=235) | <b>P-value*</b> |
|-------------------------------------|---------------------------------------------------|------------------------------------------------|-----------------|
| <b>Median age, year (IQR)</b>       | 65 [54, 72]                                       | 71 [59, 77]                                    | 0.004           |
| <b>Female</b>                       | 88 (37.4)                                         | 37 (41.6)                                      | 0.580           |
| <b>ECOG PS</b>                      |                                                   |                                                | 0.446           |
| 0                                   | 156 (70.3)                                        | 62 (71.3)                                      |                 |
| 1                                   | 58 (26.1)                                         | 20 (23.0)                                      |                 |
| 2                                   | 6 (2.7)                                           | 5 (5.7)                                        |                 |
| ≥3                                  | 2 (0.9)                                           | 0 (0.0)                                        |                 |
| Unknown                             | 13                                                | 2                                              |                 |
| <b>LDH level</b>                    |                                                   |                                                | 0.503           |
| Normal                              | 185 (79.7)                                        | 66 (75.0)                                      |                 |
| 1x ULN                              | 43 (18.5)                                         | 18 (20.5)                                      |                 |
| >2x ULN                             | 4 (1.7)                                           | 4 (4.5)                                        |                 |
| <b>Stage</b>                        |                                                   |                                                | 0.853           |
| Unresectable IIIc                   | 15 (6.4)                                          | 8 (9.0)                                        |                 |
| IV-M1a                              | 27 (11.5)                                         | 9 (10.1)                                       |                 |
| IV-M1b                              | 48 (20.5)                                         | 17 (19.1)                                      |                 |
| IV-M1c                              | 144 (61.5)                                        | 55 (61.8)                                      |                 |
| <b>Metastases in ≥3 organ sites</b> | 66 (28.1)                                         | 30 (33.7)                                      | 0.394           |
| <b>Liver metastasis</b>             | 40 (17.1)                                         | 18 (20.5)                                      | 0.592           |
| <b>Brain metastasis</b>             |                                                   |                                                | 0.735           |
| Absent                              | 199 (86.1)                                        | 75 (84.3)                                      |                 |
| Asymptomatic                        | 15 (6.5)                                          | 8 (9.0)                                        |                 |
| Symptomatic                         | 17 (7.4)                                          | 6 (6.7)                                        |                 |
| <b>BRAF-mutant</b>                  | 93 (39.6)                                         | 34 (38.2)                                      | 0.922           |

\*P-value of statistical tests comparing characteristics of patients with a complete-, partial response and stable disease at anti-PD-1 discontinuation (excluding missing values). Categorical variables were analyzed with Chi-square test and numerical variables with the unpaired t-test. ECOG PS - Eastern Cooperative Oncology Group performance status, LDH - lactate dehydrogenase, ULN - upper limit of normal, mo - months. Values are n (%) unless otherwise indicated. Missing data of less than 2.5% is not shown.
